# Supplementary material for: Seasonal Predictability of Vapor Pressure Deficit in the western United States
Source: Copernicus journal article supplement (doi:10.5194/egusphere-2025-115), 2025-02-03
Supplement: Supplementary file 1 [file egusphere-2025-115-supplement.pdf]

## **Supplemental Material for ‘Seasonal Predictability of Vapor Pressure Deficit in the western United States’**

### **a. LIM Tests**

Penland and Sardeshmukh (1995) outline a series of tests to ensure the LIM that has been constructed behaves according to the underlying assumptions of a linear system forced by white noise. The noise covariance matrix should be positive and less than one, as is the case in both LIMs constructed here (Table S1), confirming the system composed by the state vector may be approximated by the LIM components, namely the deterministic operator and the noise. Another test is the behavior of the error; the error of both LIMs used in this study closely matches the error predicted from theory and is lower than that of forecasts from persistence and a first-order autoregressive process (Fig. S1).

In a perfectly linear system, the LIM would be independent of its training lag  $\tau_o$ , while in reality this is not the case due to imperfect observations and nonlinearities (discussed further in Penland and Sardeshmukh 1995). One assessment of how linear a system represented by a LIM is, is to test how well the LIM, trained on a lag  $\tau_o$  can reproduce the lagged covariance at lags longer than  $\tau_o$  (Newman et al. 2011; example of LIM-predicted covariance for a 12-month lag:  $C(12)=G(3)^4*C(0)$ ). For VPD, the observed lagged covariance decreases markedly at a lead time of 6 months and longer, but persists even out to a 36-month lag in the western US (Fig. S2). The lagged covariance expected from the 3-month  $G$  produces a very similar evolution, although the amplitude of the covariance is lower than observations. However, this is the case even for the equal-time covariance  $C_0$ -LIM, implying the variance truncation of VPD also affects the lagged covariance which is not surprising. Nonetheless, overall the evolution and pattern produced by the LIM is generally in good agreement with observations even lags that are 12 times longer than the 3-month training lag, so we conclude the LIM approximation of linearity holds suitably well. This is bolstered by the high forecast skill the LIM is able to produce at longer lead times (Figs. 2-3).

### **b. LIM Trend Removal**

The least damped eigenmode of the LIM that includes the trend displays a temporal evolution reflecting the trend (Fig. S3a). However, it is possible that some variability in the least damped eigenmode is a convolution with other modes of the system. For these reasons, the Gram-Schmidt orthogonalization procedure (Lankham et al. 2024) is used to remove any projection of other modes onto the least damped eigenmode, resulting in a time series with lower variability and behavior more indicative of the long-term warming trend (Fig. S3b). The pattern associated with this modified time series is determined by regressing the time series onto the full-field VPD/SST/SM anomalies, and the combination of the time series and pattern are used to create trend-related anomalies for each timestep and variable in the record. To detrend each variable, these trend-related anomalies are subtracted from the full field anomalies. A new LIM is constructed using the detrended VPD and SST anomalies as described in the Methods section. Time series of area-averaged VPD and SSTs with and without the trend thus defined confirm that this method of detrending has the desired effect (Fig. S4).

| LIM with Trend:<br>eig(Q) | LIM without Trend:<br>eig(Q) |
|---------------------------|------------------------------|
| 0.0008                    | 0.0023                       |
| 0.0017                    | 0.0029                       |
| 0.0033                    | 0.0032                       |
| 0.0037                    | 0.0040                       |
| 0.0041                    | 0.0042                       |
| 0.0044                    | 0.0050                       |
| 0.0051                    | 0.0055                       |
| 0.0060                    | 0.0068                       |
| 0.0069                    | 0.0073                       |
| 0.0077                    | 0.0085                       |
| 0.0093                    | 0.0090                       |
| 0.0103                    | 0.0096                       |
| 0.0130                    | 0.0111                       |
| 0.0136                    | 0.0133                       |
| 0.0181                    | 0.0147                       |
| 0.0219                    | 0.0166                       |
| 0.0246                    | 0.0174                       |
| 0.0315                    | 0.0198                       |
| 0.0499                    | 0.0232                       |
| 0.0663                    | 0.0267                       |
| 0.0975                    | 0.0422                       |
| 0.1333                    | 0.0556                       |
| 0.1848                    | 0.1179                       |
|                           | 0.1234                       |
|                           | 0.1885                       |

46

47

48

49

Table S1: Eigenvalues of the noise parameters of the LIM including the trend (left column) and the LIM without the trend (right column) for each mode: there are 23 and 25 modes for the LIM including and removing the trend, respectively.

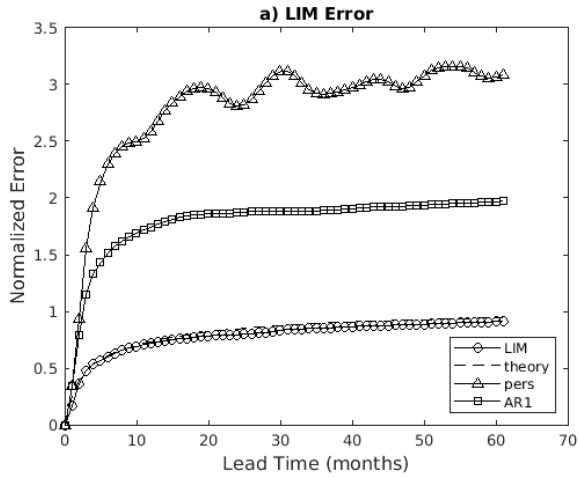

50

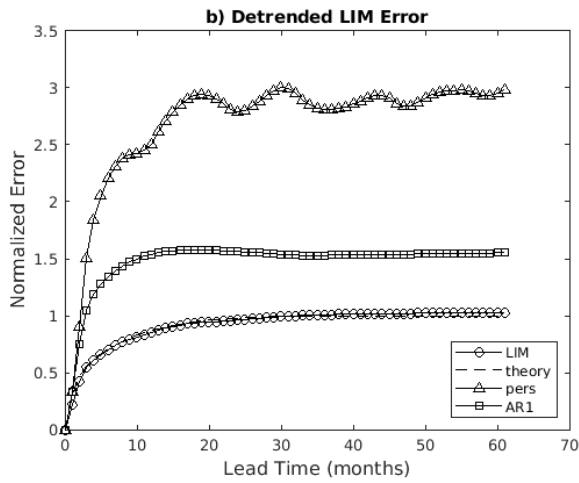

51

52

53

54

Figure S1: Forecast error as a function of lead time for the LIM compared to error from persistence and AR(1) forecasts, as well as the LIM error that is expected from theory, trace( $\mathbf{E}$ ), for a) the LIM including the trend and b) the LIM without the trend.

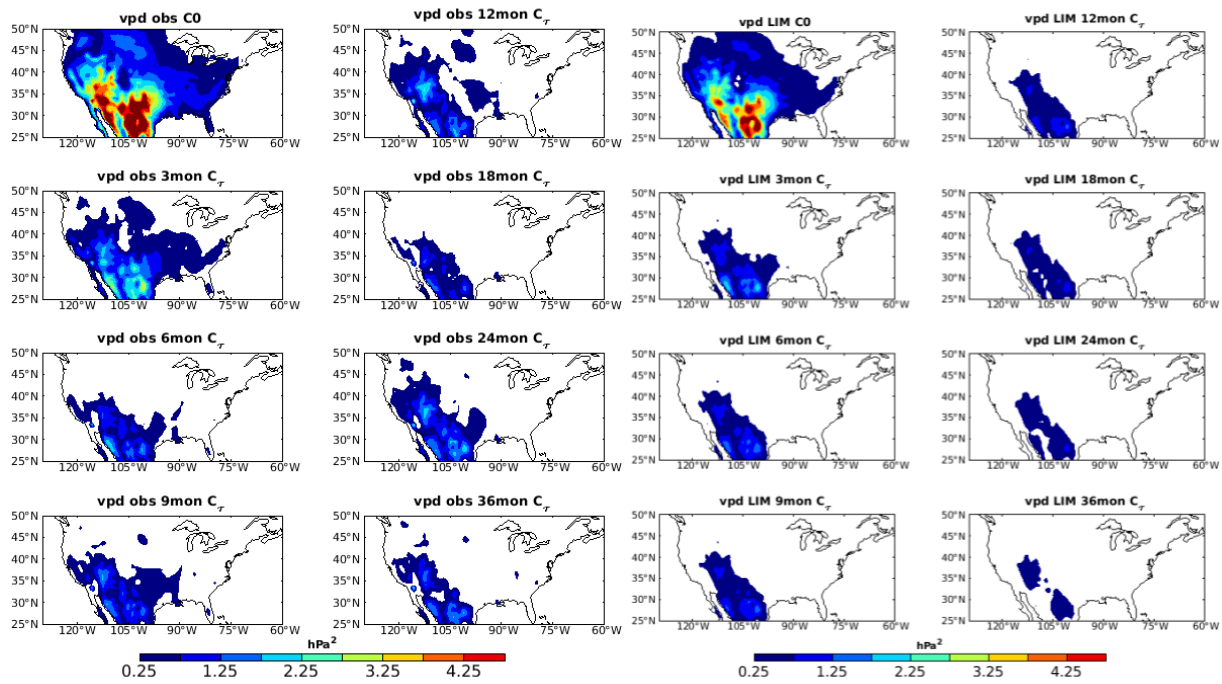

55  
56  
57  
58

Figure S2: Observed (left two columns) and LIM-calculated (right two columns) VPD covariance calculated at lags from 0 – 36 months.

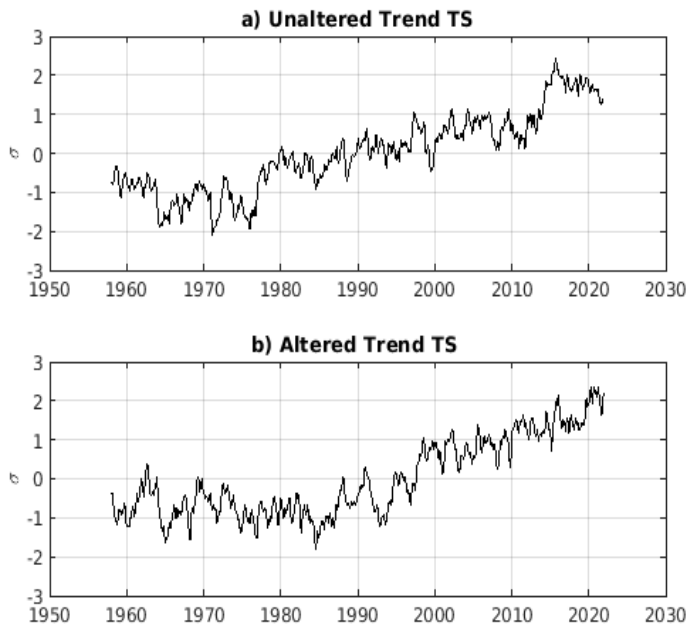

59  
60  
61

Figure S3: a) Time series of the unaltered least damped LIM eigenmode and b) the modified ‘trend’ time series after the Gram-Schmidt orthogonalization procedure has been performed.

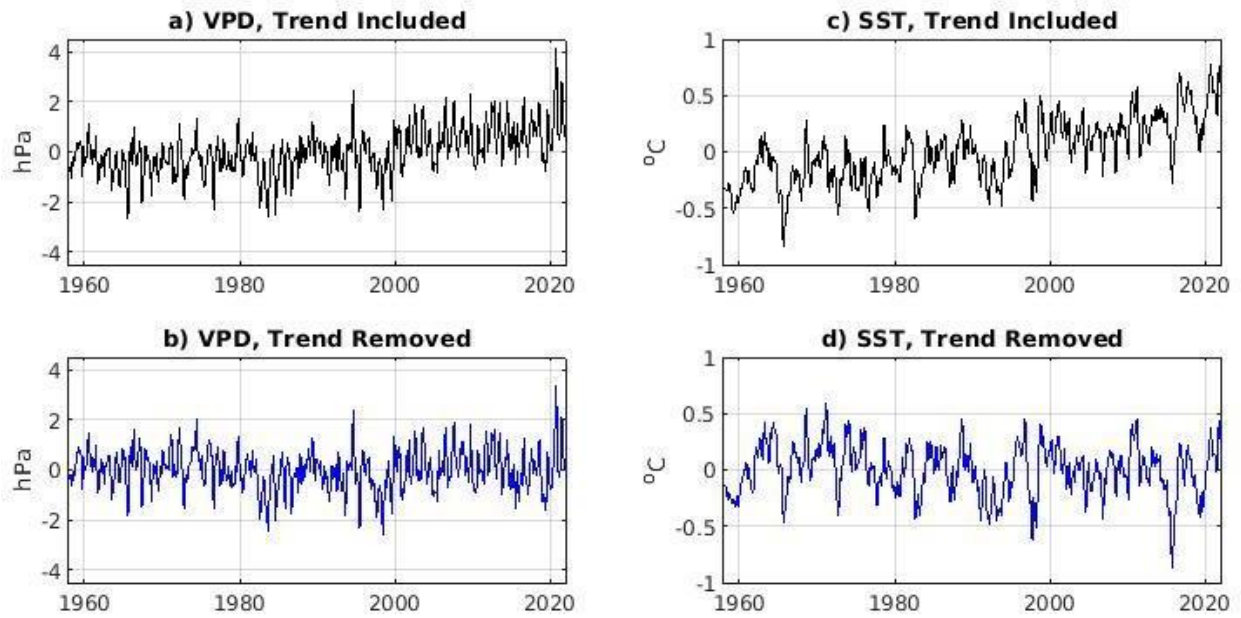

62  
 63 Figure S4: Panels a) – b) show the time series of VPD anomalies averaged over the western US  
 64 GACCs (Fig. 1), computed a) before and b) after the trend is removed. Panels c) – d) show the  
 65 time series of SST anomalies averaged over the western tropical Pacific (5°S - 10°N, 120 –  
 66 160°E) computed a) before and b) after the trend is removed.  
 67

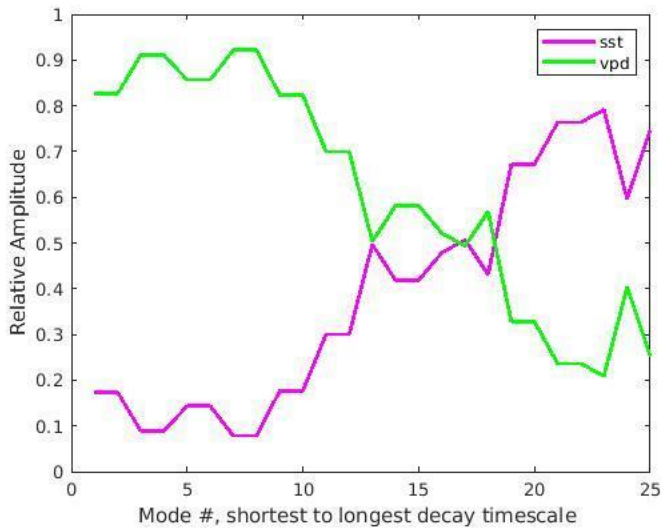

68  
 69 Figure S5: Relative amplitude of each mode in the detrended LIM. Modes are arranged from  
 70 shortest (left) to longest (right) e-folding timescale.  
 71  
 72  
 73  
 74  
 75

| Mode # | Period (months) | E-folding Timescale (months) |
|--------|-----------------|------------------------------|
| 1,2    | 60.1940         | 1.5369                       |
| 3,4    | 12.3509         | 1.5439                       |
| 5,6    | 537.2377        | 2.0707                       |
| 7,8    | 20.1352         | 2.2749                       |
| 9,10   | 16.0148         | 2.5968                       |
| 11,12  | 40.7331         | 2.7562                       |
| 13     | 0               | 3.6566                       |
| 14,15  | 37.0622         | 4.1187                       |
| 16     | 0               | 4.6003                       |
| 17     | 0               | 5.7027                       |
| 18     | 0               | 7.0340                       |
| 19,20  | 30.3200         | 8.0506                       |
| 21,22  | 83.1904         | 9.5954                       |
| 23     | 0               | 11.5343                      |
| 24     | 0               | 17.0438                      |
| 25     | 0               | 19.0051                      |

76  
77  
78  
79

Table S2: E-folding timescale and period of detrended LIM eigenmodes. Modes 1-10 (red) represent the VPD-only subspace while Modes 11-15 (blue) compose the SST-VPD subspace.

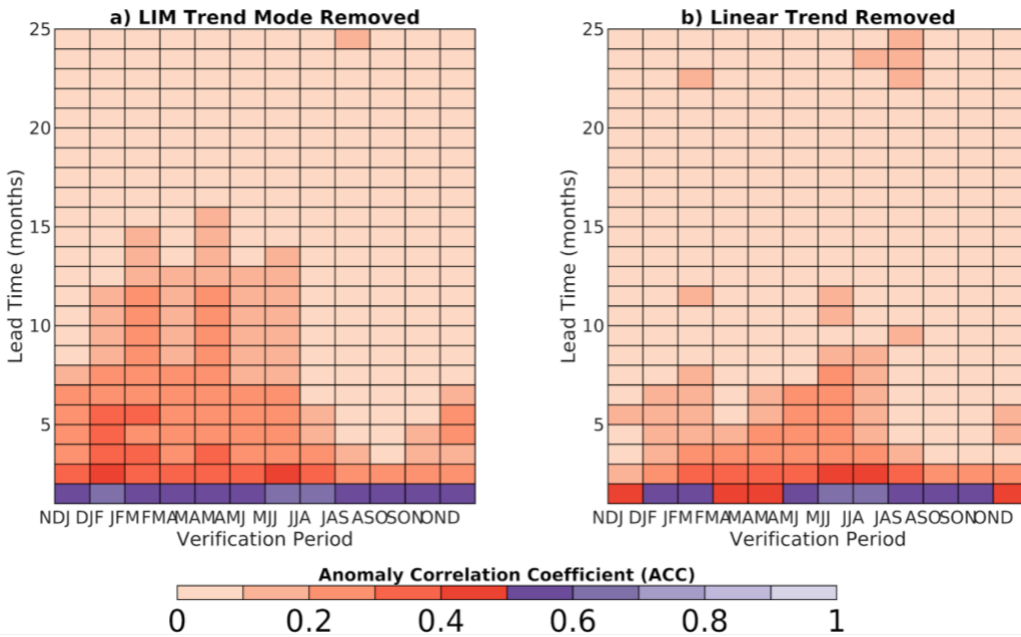

80  
81  
82  
83  
84  
85

Figure S6: Area-averaged (see Fig. 1) ACC of VPD in the detrended LIM, using a) full initial conditions (ICs) and LIM-based least damped eigenmode method of trend removal, b) full ICs and linear detrending method of trend removal. Both forecasts are verified against detrended VPD anomalies using the altered least damped eigenmode.

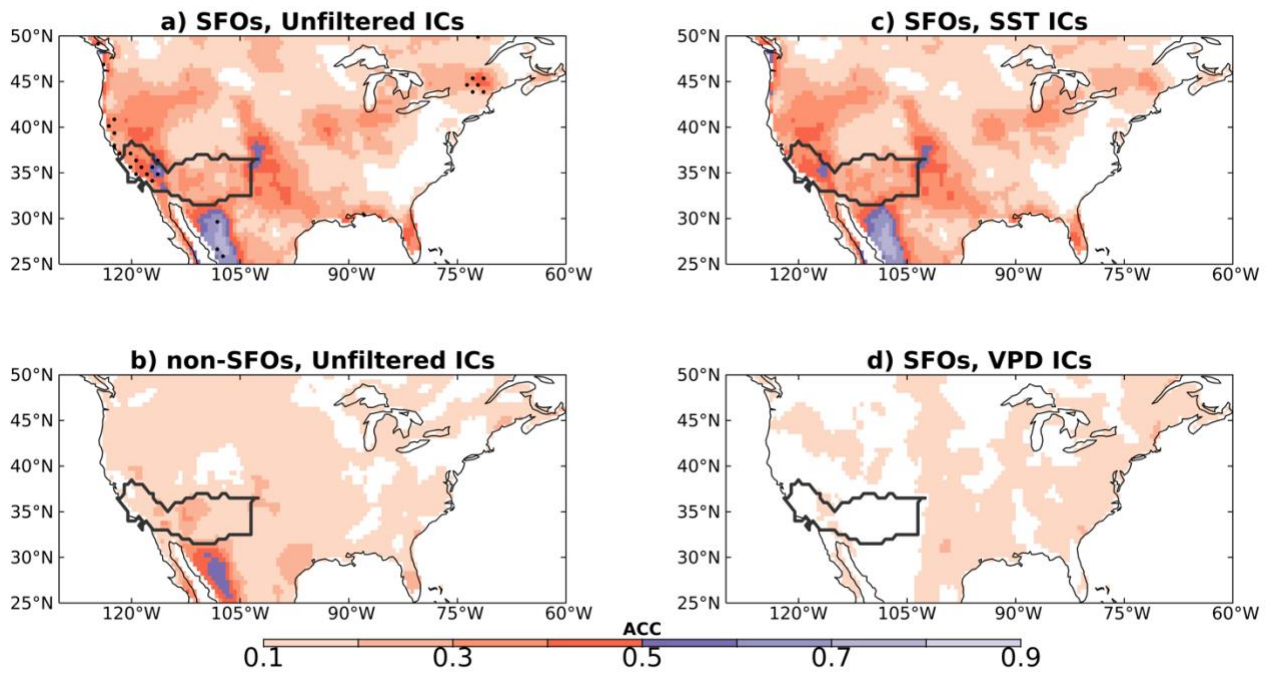

86  
 87 Figure S7: Skill of six-month a) SFOs and b) non-SFOs, and the decomposition of SFO skill into  
 88 c) SST-VPD and d) VPD-only contributions. Black stippling in panel a) shows where SFO ACC  
 89 is statistically significantly different from non-SFO ACC at 95% confidence.  
 90

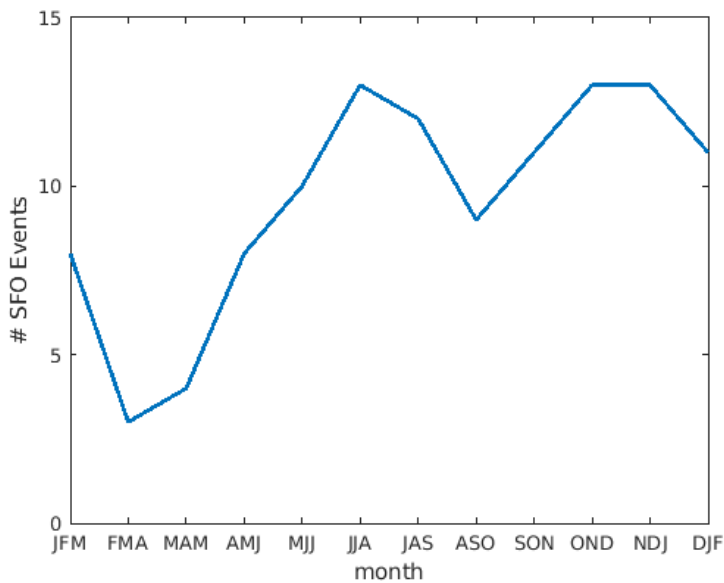

91  
 92 Figure S8: Number of three-month lead time SFOs counted for each initialization season.

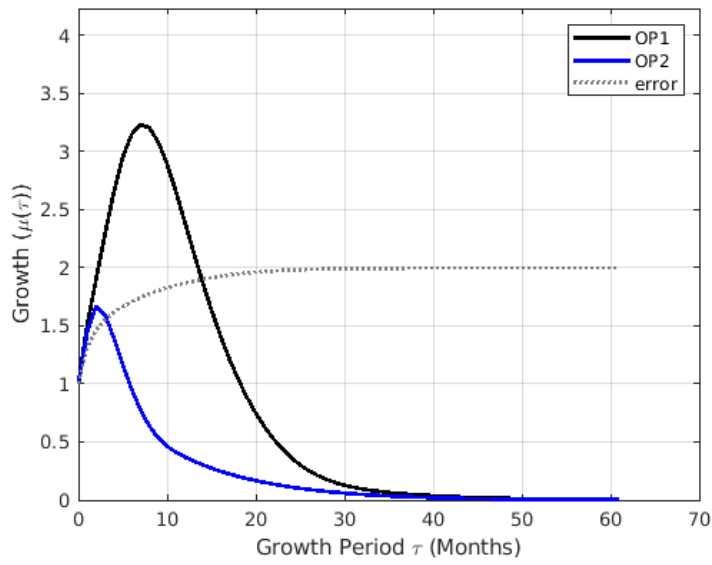

93  
 94 Figure S9: System growth measured by the first (black, OP1) and second (blue OP2) greatest  
 95 eigenvalues, as a function of growth period, for OP1 and OP2. The black dotted line shows the  
 96 growth associated with the error covariance, trace( $\mathbf{E}$ ).  
 97

98  
 99 **References**

100  
 101 Lankam, I. Nachtergaele, B., and Schilling A.: Linear Algebra, LibreTexts, 2024.  
 102  
 103 Newman, M., Alexander, M., and Scott, J.D.: An empirical model of tropical ocean  
 104 dynamics. *Climate Dynamics*, 37(9–10), 1823–1841, 2011.  
 105  
 106 Penland, C., and Sardeshmukh, P.D.: The optimal growth of tropical sea surface temperature  
 107 anomalies. *Journal of Climate*, 8, 1999–2024, 1995.  
 108
